# Supplementary material for: Bisphenol a Induces Autophagy Defects and AIF-Dependent Apoptosis via HO-1 and AMPK to Degenerate N2a Neurons
Source: MDPI journal article supplement (doi:10.3390/ijms222010948), 2021-10-11
Supplement: s1 [file s1]

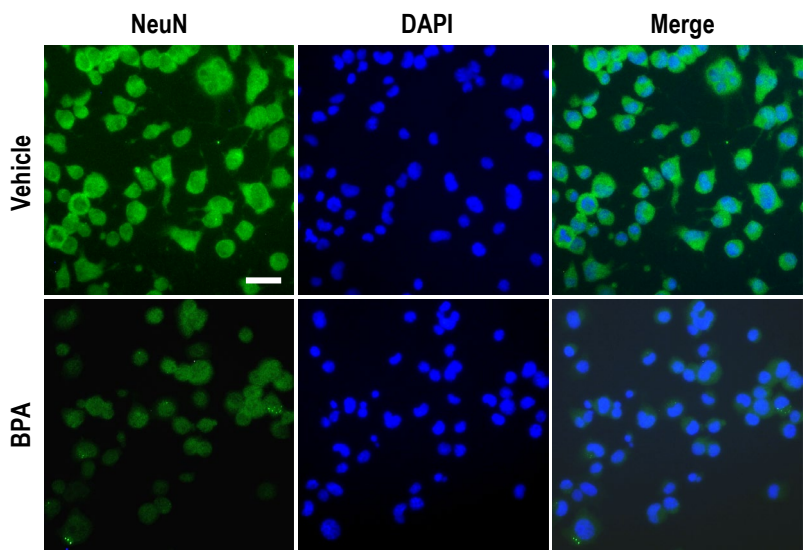

**Figure S1.** The decrease of neuronal nuclear protein (NeuN) immunoreactivity is detected in BPA-treated N2a cells as examined by fluorescence microscopy. Vehicle- and BPA-treated N2a cells were immunostained with an anti-NeuN antibody (green) and DAPI (blue, cell nuclei labeling) at 24 h. Vehicle-treated culture served as a control. Representative photos were shown to indicate the reduced NeuN protein expression in BPA-treated cultures compared to vehicle-treated cultures. Moreover, several nuclei in BPA-treated N2a cells became irregular, shrunken or smaller as the nuclear density decreased. Scale bar = 50  $\mu$ m.

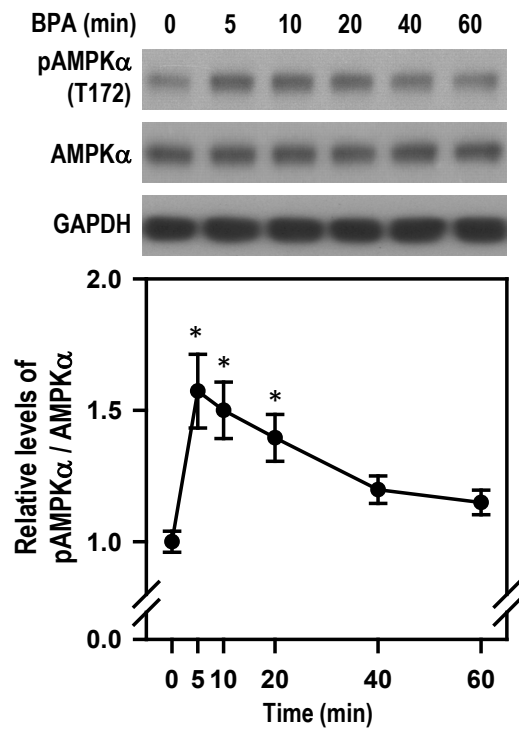

**Figure S2.** BPA induces a rapid AMPK phosphorylation. Cultures were treated with BPA (100  $\mu$ M) for 0 to 60 min. The pAMPK $\alpha$  and AMPK $\alpha$  levels were detected by Western blots. The untreated culture (BPA treatment for 0 h) was regarded as the control group. A line plot reveals the quantitative values of pAMPK $\alpha$  (normalized by AMPK $\alpha$ ) relative to the control group assigned a value of 1. Each point represents the mean  $\pm$  SEM (*n* = 4). \**p* < 0.05 vs control group.
